# Supplementary material for: Warming and altered precipitation independently and interactively suppress alpine soil microbial growth in a decadal-long experiment
Source: eLife. 2024 Apr 22;12:RP89392. doi: 10.7554/eLife.89392 (PMC11034942; doi:10.7554/eLife.89392)
Supplement: Figure 4—source data 1. [file elife-89392-fig4-data1.xlsx]

## Sheet: Sheet1
The nearest taxon index (NTI) for incorporators subjected to different interaction types under two climate change scenarios.
Climate change scenarios	Interaction types	NTI value	P value
Warming × Drought	Weak antagonistic	1.75	0.036
	Strong antagonistic	3.06	0.003
	Neutralizing effect	2.56	0.005
	Additive	2.33	0.01
	Synergistic	-0.88	0.809
Warming × Wet	Weak antagonistic	1.49	0.063
	Strong antagonistic	2.08	0.021
	Neutralizing effect	1.85	0.036
	Additive	1.16	0.116
	Synergistic	-0.67	0.761
P-value based on comparison of phylogenetic distance observed and that based on 1,000 permutations of a null model. Values in bold: P < 0.05. Low P-values (and positive indices) indicate that species are more phylogenetically related than expected by chance (phylogenetically clustering). T0-P represents the ambient temperature and decreased precipitation; T+-P represents warming and decreased pre…
