# Supplementary material for: Warming and altered precipitation independently and interactively suppress alpine soil microbial growth in a decadal-long experiment
Source: eLife. 2024 Apr 22;12:RP89392. doi: 10.7554/eLife.89392 (PMC11034942; doi:10.7554/eLife.89392)
Supplement: Figure 5—source data 1. [file elife-89392-fig5-data1.xlsx]

## Sheet: Sheet1
	Relative abundance in the original bacterial community	Average growth rate across six climate treatments (Descending order)	coding_density	gc_count	gc_percentage	genome_size	ncbi_protein_count	protein_count	Phylum	Class	Order	Family	Genus
OTU14	0.0184685	5922.46	93.8325	6652525	71.4385	9313965	8565	8641	Actinobacteria	Actinobacteria	Solirubrobacterales	Solirubrobacteraceae	Solirubrobacter
OTU31	0.0107175	3962.55	NA	NA	NA	NA	NA	NA	Actinobacteria	Actinobacteria	Actinomycetales	Pseudonocardiaceae	Pseudonocardia
OTU5	0.0101311	3633.96	NA	NA	NA	NA	NA	NA	Actinobacteria	Actinobacteria	Actinomycetales	Pseudonocardiaceae	Pseudonocardia
OTU64	0.0075057	3091.42	NA	NA	NA	NA	NA	NA	Actinobacteria	Actinobacteria	Acidimicrobiales	Acidimicrobiaceae	Ilumatobacter
OTU2	0.0103738	2899.87	NA	NA	NA	NA	NA	NA	Actinobacteria	Actinobacteria	Solirubrobacterales	Unassigned	Unassigned
OTU36	0.00580761	1953.71	NA	NA	NA	NA	NA	NA	Actinobacteria	Actinobacteria	Solirubrobacterales	Unassigned	Unassigned
OTU18	0.00493856	1697.17	NA	NA	NA	NA	NA	NA	Actinobacteria	Actinobacteria	Gaiellales	Gaiellaceae	Gaiella
OTU5852	0.00511341	1484.95	NA	NA	NA	NA	NA	NA	Actinobacteria	Actinobacteria	Solirubrobacterales	Unassigned	Unassigned
OTU17	0.00400078	1465.82	83.0722	6035747	62.6697	9631051	9287	9601	Proteobacteria	Alphaproteobacteria	Rhizobiales	Methylobacteriaceae	Microvirga
OTU7	0.0058746	1459.35	NA	NA	NA	NA	NA	NA	Proteobacteria	Alphaproteobacteria	Rhizobiales	Rhodobiaceae	Unassigned
OTU119	0.00247058	1321.51	NA	NA	NA	NA	NA	NA	Bacteroidetes	Sphingobacteriia	Sphingobacteriales	Chitinophagaceae	Unassigned
OTU13	0.00654618	1274.7	NA	NA	NA	NA	NA	NA	Gemmatimonadetes	Gemmatimonadetes	Unassigned	Unassigned	Unassigned
OTU59	0.0028316	1250.03	NA	NA	NA	NA	NA	NA	Actinobacteria	Actinobacteria	Actinomycetales	Unassigned	Unassigned
OTU222	0.00126661	1232.98	93.3955	3315943	69.4964	4771419	none	4518	Actinobacteria	Actinobacteria	Actinomycetales	Nocardioidaceae	Nocardioides
OTU65	0.00364498	1229.48	NA	NA	NA	NA	NA	NA	Actinobacteria	Actinobacteria	Solirubrobacterales	Conexibacteraceae	Unassigned
OTU96	0.00295948	1176.92	92.3336	2523700	68.7925	3668670	3442	3466	Actinobacteria	Actinobacteria	Actinomycetales	Microbacteriaceae	Microbacterium
OTU185	0.00263239	977.227	93.0539	1774646	68.074	2608841	none	2612	Actinobacteria	Actinobacteria	Solirubrobacterales	Unassigned	Unassigned
OTU23	0.00300298	936.056	91.3081	2197558	69.7234	3151821	2928	2964	Actinobacteria	Actinobacteria	Actinomycetales	Microbacteriaceae	Agromyces
OTU25	0.0049577	916.521	NA	NA	NA	NA	NA	NA	Chloroflexi	Anaerolineae	Anaerolineales	Anaerolineaceae	Unassigned
OTU92	0.0034449	894.625	NA	NA	NA	NA	NA	NA	Acidobacteria	Acidobacteria_Gp4	Unassigned	Unassigned	Gp4
OTU170	0.00350405	800.07	NA	NA	NA	NA	NA	NA	Bacteroidetes	Sphingobacteriia	Sphingobacteriales	Chitinophagaceae	Ferruginibacter
OTU110	0.00091864	699.959	92.7564	3225929	71.8505	4490190	4250	4301	Actinobacteria	Actinobacteria	Actinomycetales	Nocardioidaceae	Nocardioides
OTU515	0.00341271	696.829	NA	NA	NA	NA	NA	NA	Bacteroidetes	Sphingobacteriia	Sphingobacteriales	Chitinophagaceae	Terrimonas
OTU189	0.00150236	688.367	NA	NA	NA	NA	NA	NA	Actinobacteria	Actinobacteria	Actinomycetales	Microbacteriaceae	Unassigned
OTU87	0.00579543	685.631	NA	NA	NA	NA	NA	NA	Bacteroidetes	Sphingobacteriia	Sphingobacteriales	Chitinophagaceae	Terrimonas
OTU45	0.00270198	648.947	NA	NA	NA	NA	NA	NA	Unassigned	Unassigned	Unassigned	Unassigned	Unassigned
OTU108	0.00219743	635.186	89.7458	2746003	66.6297	4121289	none	4030	Actinobacteria	Actinobacteria	Actinomycetales	Intrasporangiaceae	Unassigned
OTU88	0.00143711	624.743	91.6468	3660839	66.1477	5534339	5314	5348	Actinobacteria	Actinobacteria	Actinomycetales	Mycobacteriaceae	Mycobacterium
OTU43	0.00225658	617.469	NA	NA	NA	NA	NA	NA	Actinobacteria	Actinobacteria	Gaiellales	Gaiellaceae	Gaiella
OTU109	0.00238359	616.867	NA	NA	NA	NA	NA	NA	Actinobacteria	Actinobacteria	Solirubrobacterales	Unassigned	Unassigned
OTU1354	0.00197821	593.837	NA	NA	NA	NA	NA	NA	Actinobacteria	Actinobacteria	Solirubrobacterales	Solirubrobacteraceae	Unassigned
OTU174	0.00218438	580.225	NA	NA	NA	NA	NA	NA	Acidobacteria	Acidobacteria_Gp4	Unassigned	Unassigned	Gp4
OTU62	0.00203649	563.975	NA	NA	NA	NA	NA	NA	Actinobacteria	Actinobacteria	Solirubrobacterales	Unassigned	Unassigned
OTU148	0.00159544	541.043	NA	NA	NA	NA	NA	NA	Actinobacteria	Actinobacteria	Solirubrobacterales	Unassigned	Unassigned
OTU67	0.00203214	536.756	NA	NA	NA	NA	NA	NA	Actinobacteria	Actinobacteria	Gaiellales	Gaiellaceae	Gaiella
OTU356	0.00178508	532.811	NA	NA	NA	NA	NA	NA	Actinobacteria	Actinobacteria	Actinomycetales	Micromonosporaceae	Micromonospora
OTU115	0.00236445	526.963	NA	NA	NA	NA	NA	NA	Acidobacteria	Acidobacteria_Gp7	Unassigned	Unassigned	Gp7
OTU411	0.00112829	495.258	NA	NA	NA	NA	NA	NA	Actinobacteria	Actinobacteria	Gaiellales	Gaiellaceae	Gaiella
OTU143	0.0013623	443.456	NA	NA	NA	NA	NA	NA	Actinobacteria	Actinobacteria	Gaiellales	Gaiellaceae	Gaiella
OTU133	0.00153368	414.027	NA	NA	NA	NA	NA	NA	Actinobacteria	Actinobacteria	Actinomycetales	Micromonosporaceae	Virgisporangium
OTU39	0.00131358	408.275	NA	NA	NA	NA	NA	NA	Actinobacteria	Actinobacteria	Gaiellales	Gaiellaceae	Gaiella
OTU210	0.00127966	403.487	NA	NA	NA	NA	NA	NA	Proteobacteria	Betaproteobacteria	Unassigned	Unassigned	Unassigned
OTU103	0.00197386	396.601	NA	NA	NA	NA	NA	NA	Actinobacteria	Actinobacteria	Actinomycetales	Unassigned	Unassigned
OTU184	0.000877753	383.393	NA	NA	NA	NA	NA	NA	Actinobacteria	Actinobacteria	Solirubrobacterales	Unassigned	Unassigned
OTU4528	0.000369718	363.307	NA	NA	NA	NA	NA	NA	Actinobacteria	Actinobacteria	Actinomycetales	Nocardioidaceae	Nocardioides
OTU524	0.000773362	358.959	NA	NA	NA	NA	NA	NA	Proteobacteria	Alphaproteobacteria	Rhodospirillales	Rhodospirillaceae	Skermanella
OTU202	0.000960396	331.782	NA	NA	NA	NA	NA	NA	Actinobacteria	Actinobacteria	Gaiellales	Gaiellaceae	Gaiella
OTU506	0.00136404	321.536	NA	NA	NA	NA	NA	NA	Planctomycetes	Planctomycetia	Planctomycetales	Planctomycetaceae	Unassigned
OTU284	0.00415041	317.736	NA	NA	NA	NA	NA	NA	Bacteroidetes	Sphingobacteriia	Sphingobacteriales	Chitinophagaceae	Ferruginibacter
OTU82	0.00115004	316.079	NA	NA	NA	NA	NA	NA	Actinobacteria	Actinobacteria	Actinomycetales	Unassigned	Unassigned
OTU387	0.00151106	304.021	NA	NA	NA	NA	NA	NA	Unassigned	Unassigned	Unassigned	Unassigned	Unassigned
OTU265	0.000776842	303.798	NA	NA	NA	NA	NA	NA	Actinobacteria	Actinobacteria	Acidimicrobiales	Acidimicrobiaceae	Ilumatobacter
OTU181	0.000759443	295.092	NA	NA	NA	NA	NA	NA	Actinobacteria	Actinobacteria	Actinomycetales	Unassigned	Unassigned
OTU76	0.000902981	292.848	NA	NA	NA	NA	NA	NA	Actinobacteria	Actinobacteria	Acidimicrobiales	Unassigned	Unassigned
OTU420	0.00150845	292.737	NA	NA	NA	NA	NA	NA	Proteobacteria	Deltaproteobacteria	Unassigned	Unassigned	Unassigned
OTU1023	0.00079337	291.871	NA	NA	NA	NA	NA	NA	Proteobacteria	Alphaproteobacteria	Rhizobiales	Unassigned	Unassigned
OTU125	0.000875143	284.277	NA	NA	NA	NA	NA	NA	Proteobacteria	Alphaproteobacteria	Unassigned	Unassigned	Unassigned
OTU2013	0.000728996	278.401	NA	NA	NA	NA	NA	NA	Actinobacteria	Actinobacteria	Actinomycetales	Microbacteriaceae	Lysinimonas
OTU93	0.00079511	258.182	NA	NA	NA	NA	NA	NA	Actinobacteria	Actinobacteria	Gaiellales	Gaiellaceae	Unassigned
OTU5014	0.00103434	256.933	NA	NA	NA	NA	NA	NA	Proteobacteria	Alphaproteobacteria	Rhizobiales	Hyphomicrobiaceae	Hyphomicrobium
OTU246	0.00150497	253.284	NA	NA	NA	NA	NA	NA	Proteobacteria	Alphaproteobacteria	Unassigned	Unassigned	Unassigned
OTU425	0.000641134	248.348	NA	NA	NA	NA	NA	NA	Actinobacteria	Actinobacteria	Actinomycetales	Unassigned	Unassigned
OTU431	0.00112481	247.2	NA	NA	NA	NA	NA	NA	Bacteroidetes	Sphingobacteriia	Sphingobacteriales	Chitinophagaceae	Ferruginibacter
OTU190	0.00057067	237.095	87.787	3834872	64.8014	5918613	5486	5513	Proteobacteria	Alphaproteobacteria	Rhizobiales	Bradyrhizobiaceae	Bosea
OTU360	0.000401035	236.431	NA	NA	NA	NA	NA	NA	Actinobacteria	Actinobacteria	Solirubrobacterales	Unassigned	Unassigned
OTU105	0.00110393	225.477	NA	NA	NA	NA	NA	NA	Actinobacteria	Actinobacteria	Actinomycetales	Unassigned	Unassigned
OTU2832	0.000661142	220.796	NA	NA	NA	NA	NA	NA	Proteobacteria	Alphaproteobacteria	Rhizobiales	Methylobacteriaceae	Microvirga
OTU272	0.00138405	219.299	NA	NA	NA	NA	NA	NA	Bacteroidetes	Cytophagia	Cytophagales	Unassigned	Chryseolinea
OTU94	0.000736825	219.014	NA	NA	NA	NA	NA	NA	Actinobacteria	Actinobacteria	Solirubrobacterales	Unassigned	Unassigned
OTU145	0.000727256	216.74	NA	NA	NA	NA	NA	NA	Actinobacteria	Actinobacteria	Acidimicrobiales	Unassigned	Unassigned
OTU5841	0.000394945	214.678	NA	NA	NA	NA	NA	NA	Proteobacteria	Gammaproteobacteria	Xanthomonadales	Xanthomonadaceae	Unassigned
OTU412	0.000667232	210.834	NA	NA	NA	NA	NA	NA	Acidobacteria	Acidobacteria_Gp6	Unassigned	Unassigned	Gp6
OTU2363	0.000333181	202.628	NA	NA	NA	NA	NA	NA	Proteobacteria	Gammaproteobacteria	Xanthomonadales	Xanthomonadaceae	Lysobacter
OTU157	0.000616776	199.805	NA	NA	NA	NA	NA	NA	Proteobacteria	Alphaproteobacteria	Rhizobiales	Unassigned	Unassigned
OTU3765	0.00045845	191.331	NA	NA	NA	NA	NA	NA	Actinobacteria	Actinobacteria	Acidimicrobiales	Acidimicrobiaceae	Ilumatobacter
OTU610	0.000604597	191.014	NA	NA	NA	NA	NA	NA	Planctomycetes	Planctomycetia	Planctomycetales	Planctomycetaceae	Singulisphaera
OTU161	0.000621996	188.221	NA	NA	NA	NA	NA	NA	Actinobacteria	Actinobacteria	Actinomycetales	Unassigned	Unassigned
OTU645	0.000585459	183.821	NA	NA	NA	NA	NA	NA	Proteobacteria	Betaproteobacteria	Burkholderiales	Unassigned	Unassigned
OTU331	0.000657662	177.008	NA	NA	NA	NA	NA	NA	Actinobacteria	Actinobacteria	Solirubrobacterales	Unassigned	Unassigned
OTU114	0.000701159	173.868	NA	NA	NA	NA	NA	NA	Actinobacteria	Actinobacteria	Gaiellales	Gaiellaceae	Gaiella
OTU371	0.000508035	173.554	NA	NA	NA	NA	NA	NA	Unassigned	Unassigned	Unassigned	Unassigned	Unassigned
OTU153	0.000596768	165.715	NA	NA	NA	NA	NA	NA	Actinobacteria	Actinobacteria	Gaiellales	Gaiellaceae	Unassigned
OTU173	0.000519344	165.25	NA	NA	NA	NA	NA	NA	Actinobacteria	Actinobacteria	Acidimicrobiales	Unassigned	Unassigned
OTU433	0.000534133	165.118	NA	NA	NA	NA	NA	NA	Acidobacteria	Acidobacteria_Gp4	Unassigned	Unassigned	Aridibacter
OTU4861	0.00057328	164.289	NA	NA	NA	NA	NA	NA	Unassigned	Unassigned	Unassigned	Unassigned	Unassigned
OTU575	0.000561101	163.18	NA	NA	NA	NA	NA	NA	Proteobacteria	Deltaproteobacteria	Myxococcales	Polyangiaceae	Unassigned
OTU447	0.000431482	160.707	NA	NA	NA	NA	NA	NA	Proteobacteria	Deltaproteobacteria	Myxococcales	Haliangiaceae	Unassigned
OTU2479	0.000370588	158.95	NA	NA	NA	NA	NA	NA	Actinobacteria	Actinobacteria	Acidimicrobiales	Unassigned	Unassigned
OTU1027	0.000378417	152.522	NA	NA	NA	NA	NA	NA	Planctomycetes	Planctomycetia	Planctomycetales	Planctomycetaceae	Pirellula
OTU437	0.000335791	152.174	NA	NA	NA	NA	NA	NA	Actinobacteria	Actinobacteria	Solirubrobacterales	Unassigned	Unassigned
OTU310	0.00045497	147.148	NA	NA	NA	NA	NA	NA	Acidobacteria	Acidobacteria_Gp4	Unassigned	Unassigned	Aridibacter
OTU3021	0.000743785	139.817	89.0861	3057346	71.3004	4287976	none	4042	Actinobacteria	Actinobacteria	Actinomycetales	Microbacteriaceae	Rathayibacter
OTU399	0.000324482	133.938	NA	NA	NA	NA	NA	NA	Acidobacteria	Acidobacteria_Gp17	Unassigned	Unassigned	Gp17
OTU286	0.000308823	132.027	NA	NA	NA	NA	NA	NA	Actinobacteria	Actinobacteria	Unassigned	Unassigned	Unassigned
OTU1586	0.000260107	129.778	NA	NA	NA	NA	NA	NA	Actinobacteria	Actinobacteria	Actinomycetales	Streptomycetaceae	Streptomyces
OTU240	0.00033927	129.407	NA	NA	NA	NA	NA	NA	Actinobacteria	Actinobacteria	Acidimicrobiales	Iamiaceae	Unassigned
OTU273	0.00056545	126.809	NA	NA	NA	NA	NA	NA	Unassigned	Unassigned	Unassigned	Unassigned	Unassigned
OTU888	0.000270546	119.924	NA	NA	NA	NA	NA	NA	Bacteroidetes	Bacteroidia	Unassigned	Unassigned	Unassigned
OTU932	0.00034188	117.997	NA	NA	NA	NA	NA	NA	Proteobacteria	Alphaproteobacteria	Rhizobiales	Rhizobiales_incertae_sedis	Bauldia
OTU476	0.000387116	116.851	NA	NA	NA	NA	NA	NA	Proteobacteria	Gammaproteobacteria	Xanthomonadales	Unassigned	Unassigned
OTU620	0.000301864	111.51	NA	NA	NA	NA	NA	NA	Gemmatimonadetes	Gemmatimonadetes	Unassigned	Unassigned	Unassigned
OTU363	0.000528044	108.904	NA	NA	NA	NA	NA	NA	Bacteroidetes	Sphingobacteriia	Sphingobacteriales	Chitinophagaceae	Parasegetibacter
OTU304	0.000429742	108.115	NA	NA	NA	NA	NA	NA	Acidobacteria	Acidobacteria_Gp4	Unassigned	Unassigned	Aridibacter
OTU2964	0.000494987	107.05	NA	NA	NA	NA	NA	NA	Proteobacteria	Betaproteobacteria	Unassigned	Unassigned	Unassigned
OTU408	0.000373197	106.406	NA	NA	NA	NA	NA	NA	candidate_division_WPS-1	Unassigned	Unassigned	Unassigned	WPS-1_genera_incertae_sedis
OTU376	0.000410604	103.053	NA	NA	NA	NA	NA	NA	Proteobacteria	Alphaproteobacteria	Rhodospirillales	Rhodospirillaceae	Dongia
OTU1002	0.000354929	98.2813	NA	NA	NA	NA	NA	NA	Planctomycetes	Planctomycetia	Planctomycetales	Planctomycetaceae	Unassigned
OTU552	0.0003384	97.8903	NA	NA	NA	NA	NA	NA	Unassigned	Unassigned	Unassigned	Unassigned	Unassigned
OTU3562	0.000201822	97.0485	NA	NA	NA	NA	NA	NA	Proteobacteria	Alphaproteobacteria	Rhizobiales	Unassigned	Unassigned
OTU465	0.000350579	94.5488	NA	NA	NA	NA	NA	NA	Unassigned	Unassigned	Unassigned	Unassigned	Unassigned
OTU1657	0.000259237	93.5271	NA	NA	NA	NA	NA	NA	Acidobacteria	Acidobacteria_Gp6	Unassigned	Unassigned	Gp6
OTU351	0.000297514	92.8962	NA	NA	NA	NA	NA	NA	Proteobacteria	Alphaproteobacteria	Sphingomonadales	Sphingomonadaceae	Unassigned
OTU543	0.000271416	86.0547	NA	NA	NA	NA	NA	NA	Proteobacteria	Alphaproteobacteria	Rhizobiales	Unassigned	Unassigned
OTU856	0.000208782	85.2074	NA	NA	NA	NA	NA	NA	Proteobacteria	Deltaproteobacteria	Myxococcales	Labilitrichaceae	Labilithrix
OTU644	0.000274896	82.5723	NA	NA	NA	NA	NA	NA	Firmicutes	Unassigned	Unassigned	Unassigned	Unassigned
OTU330	0.000653313	82.232	84.08	1517327	42.1363	3600997	none	3534	Firmicutes	Bacilli	Bacillales	Planococcaceae	Unassigned
OTU716	0.000144407	81.4343	NA	NA	NA	NA	NA	NA	Planctomycetes	Planctomycetia	Planctomycetales	Planctomycetaceae	Zavarzinella
OTU822	0.000207912	81.3247	NA	NA	NA	NA	NA	NA	Unassigned	Unassigned	Unassigned	Unassigned	Unassigned
OTU305	0.0002314	80.8257	NA	NA	NA	NA	NA	NA	Actinobacteria	Actinobacteria	Acidimicrobiales	Unassigned	Unassigned
OTU307	0.000372327	79.8019	NA	NA	NA	NA	NA	NA	Proteobacteria	Deltaproteobacteria	Myxococcales	Unassigned	Unassigned
OTU1043	0.000184424	79.5288	89.1132	7285735	70.5962	10320296	9302	9501	Actinobacteria	Actinobacteria	Actinomycetales	Micromonosporaceae	Actinoplanes
OTU1341	0.000179204	79.2584	NA	NA	NA	NA	NA	NA	Actinobacteria	Actinobacteria	Acidimicrobiales	Iamiaceae	Iamia
OTU368	0.000332311	78.3343	NA	NA	NA	NA	NA	NA	Proteobacteria	Alphaproteobacteria	Rhizobiales	Rhizobiaceae	Unassigned
OTU642	0.000427133	78.3271	NA	NA	NA	NA	NA	NA	Firmicutes	Unassigned	Unassigned	Unassigned	Unassigned
OTU684	0.00022357	74.5575	NA	NA	NA	NA	NA	NA	Gemmatimonadetes	Gemmatimonadetes	Gemmatimonadales	Gemmatimonadaceae	Gemmatimonas
OTU916	0.000139188	74.0221	NA	NA	NA	NA	NA	NA	Unassigned	Unassigned	Unassigned	Unassigned	Unassigned
OTU1142	0.000301864	73.7269	NA	NA	NA	NA	NA	NA	Proteobacteria	Alphaproteobacteria	Rhizobiales	Unassigned	Unassigned
OTU1140	0.000147887	73.7111	NA	NA	NA	NA	NA	NA	Planctomycetes	Planctomycetia	Planctomycetales	Planctomycetaceae	Blastopirellula
OTU249	0.000422783	73.3509	NA	NA	NA	NA	NA	NA	Bacteroidetes	Sphingobacteriia	Sphingobacteriales	Chitinophagaceae	Terrimonas
OTU1000	0.000144407	73.0309	NA	NA	NA	NA	NA	NA	Unassigned	Unassigned	Unassigned	Unassigned	Unassigned
OTU519	0.00033753	72.9164	NA	NA	NA	NA	NA	NA	Actinobacteria	Actinobacteria	Solirubrobacterales	Unassigned	Unassigned
OTU739	0.000214871	72.8936	NA	NA	NA	NA	NA	NA	Unassigned	Unassigned	Unassigned	Unassigned	Unassigned
OTU468	0.000182684	71.6314	NA	NA	NA	NA	NA	NA	Acidobacteria	Acidobacteria_Gp4	Unassigned	Unassigned	Gp4
OTU690	0.000103521	69.4075	NA	NA	NA	NA	NA	NA	Planctomycetes	Planctomycetia	Planctomycetales	Planctomycetaceae	Blastopirellula
OTU949	0.000314042	68.6344	NA	NA	NA	NA	NA	NA	Unassigned	Unassigned	Unassigned	Unassigned	Unassigned
OTU490	0.000278376	67.7661	NA	NA	NA	NA	NA	NA	Unassigned	Unassigned	Unassigned	Unassigned	Unassigned
OTU852	0.000192253	66.9151	NA	NA	NA	NA	NA	NA	Verrucomicrobia	Subdivision3	Unassigned	Unassigned	Subdivision3_genera_incertae_sedis
OTU486	0.000191383	65.8108	NA	NA	NA	NA	NA	NA	Actinobacteria	Actinobacteria	Acidimicrobiales	Unassigned	Unassigned
OTU1875	7.91631e-05	65.6572	NA	NA	NA	NA	NA	NA	Unassigned	Unassigned	Unassigned	Unassigned	Unassigned
OTU834	0.000157456	64.3485	NA	NA	NA	NA	NA	NA	Chloroflexi	Anaerolineae	Unassigned	Unassigned	Unassigned
OTU547	0.000153977	64.2276	90.9863	4335376	62.3823	6952273	none	6506	Actinobacteria	Actinobacteria	Actinomycetales	Nocardiaceae	Rhodococcus
OTU1710	0.000171375	61.3862	NA	NA	NA	NA	NA	NA	Proteobacteria	Deltaproteobacteria	Unassigned	Unassigned	Unassigned
OTU2359	9.39518e-05	60.8464	NA	NA	NA	NA	NA	NA	Unassigned	Unassigned	Unassigned	Unassigned	Unassigned
OTU564	8.09029e-05	60.5244	84.1264	5623313	64.3752	8735584	none	8009	Proteobacteria	Betaproteobacteria	Burkholderiales	Burkholderiaceae	Burkholderia
OTU5596	0.000106131	60.3503	NA	NA	NA	NA	NA	NA	Proteobacteria	Alphaproteobacteria	Sphingomonadales	Sphingomonadaceae	Sphingobium
OTU1449	0.000286205	59.7507	NA	NA	NA	NA	NA	NA	Planctomycetes	Planctomycetia	Planctomycetales	Planctomycetaceae	Unassigned
OTU1299	0.000195733	59.285	NA	NA	NA	NA	NA	NA	candidate_division_WPS-1	Unassigned	Unassigned	Unassigned	WPS-1_genera_incertae_sedis
OTU797	0.000203562	58.3882	NA	NA	NA	NA	NA	NA	Acidobacteria	Acidobacteria_Gp17	Unassigned	Unassigned	Gp17
OTU348	0.000483678	58.3444	NA	NA	NA	NA	NA	NA	Proteobacteria	Deltaproteobacteria	Unassigned	Unassigned	Unassigned
OTU771	0.000257497	56.1245	NA	NA	NA	NA	NA	NA	Bacteroidetes	Sphingobacteriia	Sphingobacteriales	Chitinophagaceae	Flavisolibacter
OTU891	0.000166155	56.0088	NA	NA	NA	NA	NA	NA	candidate_division_WPS-1	Unassigned	Unassigned	Unassigned	Unassigned
OTU799	0.000173115	54.5179	NA	NA	NA	NA	NA	NA	Chloroflexi	Unassigned	Unassigned	Unassigned	Unassigned
OTU964	0.000314912	54.1301	NA	NA	NA	NA	NA	NA	Actinobacteria	Actinobacteria	Solirubrobacterales	Unassigned	Unassigned
OTU354	0.000296644	54.0239	NA	NA	NA	NA	NA	NA	Proteobacteria	Betaproteobacteria	Unassigned	Unassigned	Unassigned
OTU896	0.000168765	53.5453	NA	NA	NA	NA	NA	NA	Unassigned	Unassigned	Unassigned	Unassigned	Unassigned
OTU608	0.000199213	53.1774	NA	NA	NA	NA	NA	NA	Proteobacteria	Gammaproteobacteria	Unassigned	Unassigned	Unassigned
OTU421	0.000194863	52.9115	NA	NA	NA	NA	NA	NA	Proteobacteria	Alphaproteobacteria	Rhodospirillales	Rhodospirillaceae	Unassigned
OTU680	0.000168765	52.4772	NA	NA	NA	NA	NA	NA	Unassigned	Unassigned	Unassigned	Unassigned	Unassigned
OTU1258	0.000172245	52.2347	NA	NA	NA	NA	NA	NA	Proteobacteria	Deltaproteobacteria	Myxococcales	Haliangiaceae	Haliangium
OTU546	0.000327961	51.5198	NA	NA	NA	NA	NA	NA	Acidobacteria	Acidobacteria_Gp18	Unassigned	Unassigned	Gp18
OTU657	0.000169635	51.4853	NA	NA	NA	NA	NA	NA	Unassigned	Unassigned	Unassigned	Unassigned	Unassigned
OTU738	0.000260977	51.4461	NA	NA	NA	NA	NA	NA	Acidobacteria	Acidobacteria_Gp3	Unassigned	Unassigned	Gp3
OTU443	0.000255758	51.3494	NA	NA	NA	NA	NA	NA	Actinobacteria	Actinobacteria	Gaiellales	Unassigned	Unassigned
OTU1373	9.91713e-05	49.0637	NA	NA	NA	NA	NA	NA	Planctomycetes	Planctomycetia	Planctomycetales	Planctomycetaceae	Zavarzinella
OTU1826	0.000126139	48.2737	NA	NA	NA	NA	NA	NA	Planctomycetes	Planctomycetia	Planctomycetales	Planctomycetaceae	Unassigned
OTU875	0.00022618	48.007	NA	NA	NA	NA	NA	NA	Acidobacteria	Acidobacteria_Gp3	Unassigned	Unassigned	Gp3
OTU1189	0.000136578	47.1518	NA	NA	NA	NA	NA	NA	Proteobacteria	Deltaproteobacteria	Unassigned	Unassigned	Unassigned
OTU508	0.000133098	46.516	NA	NA	NA	NA	NA	NA	Unassigned	Unassigned	Unassigned	Unassigned	Unassigned
OTU4120	0.000107871	46.1752	NA	NA	NA	NA	NA	NA	Proteobacteria	Deltaproteobacteria	Myxococcales	Unassigned	Unassigned
OTU5196	8.78623e-05	43.9393	NA	NA	NA	NA	NA	NA	Proteobacteria	Betaproteobacteria	Unassigned	Unassigned	Unassigned
OTU1267	0.00011309	43.8575	NA	NA	NA	NA	NA	NA	Planctomycetes	Planctomycetia	Planctomycetales	Planctomycetaceae	Unassigned
OTU1245	0.000147887	43.3192	NA	NA	NA	NA	NA	NA	Planctomycetes	Planctomycetia	Planctomycetales	Planctomycetaceae	Gemmata
OTU711	0.000173985	42.756	NA	NA	NA	NA	NA	NA	Unassigned	Unassigned	Unassigned	Unassigned	Unassigned
OTU2927	8.35127e-05	42.7408	NA	NA	NA	NA	NA	NA	Proteobacteria	Alphaproteobacteria	Rhizobiales	Phyllobacteriaceae	Mesorhizobium
OTU1895	8.69924e-05	42.5815	89.3073	1324138	45.13	2934474	none	2772	Bacteroidetes	Sphingobacteriia	Sphingobacteriales	Chitinophagaceae	Chitinophaga
OTU1235	8.96021e-05	42.3765	NA	NA	NA	NA	NA	NA	Proteobacteria	Gammaproteobacteria	Xanthomonadales	Xanthomonadaceae	Unassigned
OTU780	0.000183554	41.9245	NA	NA	NA	NA	NA	NA	Nitrospirae	Nitrospira	Nitrospirales	Nitrospiraceae	Nitrospira
OTU1185	0.000147017	41.2439	NA	NA	NA	NA	NA	NA	Proteobacteria	Deltaproteobacteria	Myxococcales	Polyangiaceae	Polyangium
OTU1717	0.0001157	41.1662	NA	NA	NA	NA	NA	NA	Proteobacteria	Deltaproteobacteria	Unassigned	Unassigned	Unassigned
OTU4801	8.61225e-05	40.7806	NA	NA	NA	NA	NA	NA	Firmicutes	Unassigned	Unassigned	Unassigned	Unassigned
OTU1353	0.000182684	40.5027	NA	NA	NA	NA	NA	NA	Acidobacteria	Acidobacteria_Gp5	Unassigned	Unassigned	Gp5
OTU828	7.39435e-05	38.0098	NA	NA	NA	NA	NA	NA	Actinobacteria	Actinobacteria	Actinomycetales	Thermomonosporaceae	Actinocorallia
OTU571	0.00045497	36.3905	NA	NA	NA	NA	NA	NA	Bacteroidetes	Sphingobacteriia	Sphingobacteriales	Chitinophagaceae	Parafilimonas
OTU980	6.17646e-05	35.2181	NA	NA	NA	NA	NA	NA	Proteobacteria	Alphaproteobacteria	Rhodospirillales	Unassigned	Unassigned
OTU1501	9.48217e-05	34.897	90.3929	8905522	70.2957	12670262	none	9788	Proteobacteria	Deltaproteobacteria	Myxococcales	Myxococcaceae	Myxococcus
OTU4084	9.65615e-05	33.9012	NA	NA	NA	NA	NA	NA	Proteobacteria	Gammaproteobacteria	Xanthomonadales	Xanthomonadaceae	Unassigned
OTU935	7.82931e-05	33.5363	NA	NA	NA	NA	NA	NA	Unassigned	Unassigned	Unassigned	Unassigned	Unassigned
OTU1558	9.83014e-05	33.3458	NA	NA	NA	NA	NA	NA	Proteobacteria	Alphaproteobacteria	Rhodobacterales	Rhodobacteraceae	Unassigned
OTU6415	8.69924e-05	33.3354	NA	NA	NA	NA	NA	NA	Actinobacteria	Actinobacteria	Actinomycetales	Nocardioidaceae	Nocardioides
OTU3620	0.00010874	32.8291	NA	NA	NA	NA	NA	NA	Verrucomicrobia	Opitutae	Opitutales	Opitutaceae	Opitutus
OTU1226	8.09029e-05	31.6125	NA	NA	NA	NA	NA	NA	Unassigned	Unassigned	Unassigned	Unassigned	Unassigned
OTU1101	0.000132228	31.5097	NA	NA	NA	NA	NA	NA	Acidobacteria	Acidobacteria_Gp3	Unassigned	Unassigned	Gp3
OTU1205	0.000140928	31.3991	NA	NA	NA	NA	NA	NA	Armatimonadetes	Chthonomonadetes	Chthonomonadales	Chthonomonadaceae	Chthonomonas/Armatimonadetes_gp3
OTU5977	0.000136578	31.3104	NA	NA	NA	NA	NA	NA	Actinobacteria	Actinobacteria	Actinomycetales	Pseudonocardiaceae	Pseudonocardia
OTU882	0.000127879	29.9347	NA	NA	NA	NA	NA	NA	Chloroflexi	Anaerolineae	Anaerolineales	Anaerolineaceae	Unassigned
OTU1738	7.13337e-05	29.7867	NA	NA	NA	NA	NA	NA	Planctomycetes	Planctomycetia	Planctomycetales	Planctomycetaceae	Unassigned
OTU773	0.000170505	29.4407	NA	NA	NA	NA	NA	NA	Proteobacteria	Alphaproteobacteria	Rhizobiales	Unassigned	Unassigned
OTU2007	0.00011483	29.4099	NA	NA	NA	NA	NA	NA	Planctomycetes	Planctomycetia	Planctomycetales	Planctomycetaceae	Pirellula
OTU1815	8.52525e-05	28.5322	NA	NA	NA	NA	NA	NA	Verrucomicrobia	Opitutae	Opitutales	Opitutaceae	Opitutus
OTU538	0.00011396	25.8358	NA	NA	NA	NA	NA	NA	Unassigned	Unassigned	Unassigned	Unassigned	Unassigned
OTU507	0.00011309	25.0104	NA	NA	NA	NA	NA	NA	Unassigned	Unassigned	Unassigned	Unassigned	Unassigned
OTU1383	0.000125269	24.8731	NA	NA	NA	NA	NA	NA	Chloroflexi	Caldilineae	Caldilineales	Caldilineaceae	Litorilinea
OTU1047	0.000161806	24.0638	NA	NA	NA	NA	NA	NA	Proteobacteria	Deltaproteobacteria	Desulfuromonadales	Unassigned	Unassigned
OTU5554	0.000130489	23.22	NA	NA	NA	NA	NA	NA	Unassigned	Unassigned	Unassigned	Unassigned	Unassigned
OTU823	0.000205302	22.7743	NA	NA	NA	NA	NA	NA	Acidobacteria	Acidobacteria_Gp4	Unassigned	Unassigned	Gp4
OTU1423	7.30736e-05	22.1777	NA	NA	NA	NA	NA	NA	Actinobacteria	Actinobacteria	Acidimicrobiales	Iamiaceae	Unassigned
OTU1199	9.91713e-05	22.1458	NA	NA	NA	NA	NA	NA	Unassigned	Unassigned	Unassigned	Unassigned	Unassigned
OTU1667	9.74315e-05	19.6315	NA	NA	NA	NA	NA	NA	Unassigned	Unassigned	Unassigned	Unassigned	Unassigned
OTU1263	8.0033e-05	18.8025	NA	NA	NA	NA	NA	NA	Unassigned	Unassigned	Unassigned	Unassigned	Unassigned
OTU1282	0.000132228	18.5519	NA	NA	NA	NA	NA	NA	Unassigned	Unassigned	Unassigned	Unassigned	Unassigned
OTU1231	6.61142e-05	17.8833	NA	NA	NA	NA	NA	NA	Chloroflexi	Caldilineae	Caldilineales	Caldilineaceae	Litorilinea
OTU5459	5.56751e-05	17.8723	NA	NA	NA	NA	NA	NA	candidate_division_WPS-1	Unassigned	Unassigned	Unassigned	WPS-1_genera_incertae_sedis
OTU1497	8.52525e-05	17.1155	NA	NA	NA	NA	NA	NA	Unassigned	Unassigned	Unassigned	Unassigned	Unassigned
OTU3306	6.35044e-05	17.0004	NA	NA	NA	NA	NA	NA	Actinobacteria	Actinobacteria	Solirubrobacterales	Conexibacteraceae	Unassigned
OTU1488	0.00010874	14.7494	NA	NA	NA	NA	NA	NA	Proteobacteria	Alphaproteobacteria	Rhodospirillales	Unassigned	Unassigned
